# Supplementary material for: The prevalence and health burden of malnutrition in Belgian older people in the community or residing in nursing homes: results of the NutriAction II study
Source: PubMed Central journal article supplement (PMC6373383; doi:10.1007/s40520-018-0957-2), 2018-04-30
Supplement: 40520_2018_957_MOESM1_ESM.pdf [file 40520_2018_957_MOESM1_ESM.pdf]

|                                                                                                                                                                                                                                                                                                                                                                                                                                   |                                                                                                                                                                                                               |
|-----------------------------------------------------------------------------------------------------------------------------------------------------------------------------------------------------------------------------------------------------------------------------------------------------------------------------------------------------------------------------------------------------------------------------------|---------------------------------------------------------------------------------------------------------------------------------------------------------------------------------------------------------------|
| <b>Gegevens van de uitvoerder :</b><br>Naam en voornaam : .....<br>rijksregisternummer..... Geboortedatum (dd/mm/yyyy): .....<br>e-mailadres of adres (waar het resultaat van de screening naar toe mag gestuurd worden) :<br>.....                                                                                                                                                                                               |                                                                                                                                                                                                               |
| Gebruikersgroep <b>uitvoerder</b> (kruis aan wat best past) :<br><input type="radio"/> verpleger(ster) WZC<br><input type="radio"/> arts WZC<br><input type="radio"/> Wit-Gele Kruis<br><input type="radio"/> Mederi<br><input type="radio"/> Solidariteit voor het gezin<br><input type="radio"/> Providhom<br><input type="radio"/> andere verpleger(ster)<br><input type="radio"/> andere arts<br><input type="radio"/> andere | <b>Gegevens van de patiënt</b><br>Nationaal registratienummer<br>.....<br>Naam en voornaam.....<br>.....<br>Geboortedatum (dd/mm/yyyy)<br>.....<br>Taal : <input type="radio"/> NL / <input type="radio"/> FR |

Algemene opmerkingen : Gelieve de gewenste antwoorden aan te duiden of in te vullen, er zijn meerdere antwoorden per vraag mogelijk.

1. Denkt u dat de patiënt ondervoed is  ja  neen

---

2. Het geslacht van de patiënt is  man  vrouw

---

3. De leeftijd van de patiënt is ..... jaar

---

4. Het gewicht van de patiënt is ..... kg  
 Het gewicht werd o gemeten

---

5. De lengte van de patiënt is ..... m

---

6. Bovenarmomtrek van de patiënt is ..... cm (zie tekening)  onbekend

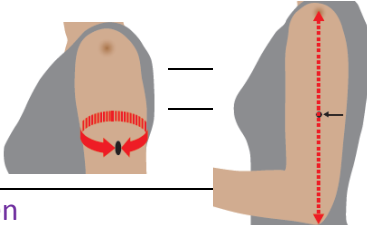

---

7. Denkt de patiënt dat hij/zij ondervoed is  ja  neen

---

8. Is er de laatste 3 maanden ongewenst gewichtsverlies bij de patiënt?

|                                           |                                               |
|-------------------------------------------|-----------------------------------------------|
| <input type="checkbox"/> tussen 1 en 3 kg | <input type="checkbox"/> geen gewichtsverlies |
| <input type="checkbox"/> tussen 3 en 6 kg | <input type="checkbox"/> onbekend             |
| <input type="checkbox"/> meer dan 6 kg    |                                               |

---

9. Werd de patiënt de laatste 3 maanden opgenomen in het ziekenhuis?

|                             |                               |
|-----------------------------|-------------------------------|
| <input type="checkbox"/> ja | <input type="checkbox"/> neen |
|-----------------------------|-------------------------------|

---

10. Wat is de woonsituatie van de patiënt?

|                                                                                                                                                                                                 |                                                                                                                                                                                                                                                                                                                          |
|-------------------------------------------------------------------------------------------------------------------------------------------------------------------------------------------------|--------------------------------------------------------------------------------------------------------------------------------------------------------------------------------------------------------------------------------------------------------------------------------------------------------------------------|
| <u>In een instelling?</u><br><input type="checkbox"/> ziekenhuis<br><input type="checkbox"/> woon- en zorgcentrum<br><input type="checkbox"/> dagopvang<br><input type="checkbox"/> nachtopvang | <u>Thuis</u><br><input type="checkbox"/> partner<br><input type="checkbox"/> partner met externe hulp (familiehulp, thuisverpleegkundige,...)<br><input type="checkbox"/> alleen<br><input type="checkbox"/> alleen met externe hulp (familiehulp, thuisverpleegkundige,...)<br><input type="checkbox"/> kangoeroewoning |
|-------------------------------------------------------------------------------------------------------------------------------------------------------------------------------------------------|--------------------------------------------------------------------------------------------------------------------------------------------------------------------------------------------------------------------------------------------------------------------------------------------------------------------------|

---

11. Hoe zelfstandig is de patiënt in zijn/haar dagelijkse activiteit?

**zich wassen**  zonder enige hulp  
 gedeeltelijke hulp, boven of onder de gordel  
 gedeeltelijke hulp zowel boven als onder de gordel  
 volledige hulp zowel boven als onder de gordel

---

**zich kleden**  zonder enige hulp  
 gedeeltelijke hulp, boven of onder de gordel (zonder rekening te houden met veters)  
 gedeeltelijke hulp zowel boven als onder de gordel  
 volledige hulp zowel boven als onder de gordel

---

**transfer en verplaatsingen**  volledig zelfstandig voor verplaatsing zonder mechanische hulp of hulp van derden  
 zelfstandig voor verplaatsingen mits het gebruik van mechanische hulpmiddelen (kruk(ken),

|                     |                                                                                                                                                                                                                                                                                                                                                                                                                                                          |
|---------------------|----------------------------------------------------------------------------------------------------------------------------------------------------------------------------------------------------------------------------------------------------------------------------------------------------------------------------------------------------------------------------------------------------------------------------------------------------------|
|                     | rolstoel, ...)                                                                                                                                                                                                                                                                                                                                                                                                                                           |
|                     | <input type="checkbox"/> volstrekte hulp nodig van derden voor minstens één van de transfers en/of verplaatsingen<br><input type="checkbox"/> bedlegerig of in een rolstoel en volledig afhankelijk van anderen om zich te verplaatsen                                                                                                                                                                                                                   |
| <b>toiletbezoek</b> | <input type="checkbox"/> kan alleen naar het toilet gaan, zich kleden en zich reinigen<br><input type="checkbox"/> heeft hulp nodig voor 1 van de 3 items : zich verplaatsen of zich kleden of zich reinigen<br><input type="checkbox"/> heeft hulp nodig voor 2 van de 3 items : zich verplaatsen en/of zich kleden en/of zich reinigen<br><input type="checkbox"/> heeft hulp nodig voor de 3 items : zich verplaatsen en zich kleden en zich reinigen |
| <b>continentie</b>  | <input type="checkbox"/> Is continent voor urine en faeces<br><input type="checkbox"/> Is accidenteel incontinent voor urine of faeces (incl. blaassonde of kunstaars)<br><input type="checkbox"/> Is incontinent voor urine (incl. mictietraining) of faeces<br><input type="checkbox"/> Is incontinent voor urine en faeces                                                                                                                            |
| <b>eten</b>         | <input type="checkbox"/> kan alleen eten en drinken<br><input type="checkbox"/> heeft vooraf hulp nodig om te eten of te drinken<br><input type="checkbox"/> heeft gedeeltelijke hulp nodig tijdens het eten of drinken<br><input type="checkbox"/> de patiënt is volledig afhankelijk om te eten of te drinken                                                                                                                                          |
| <b>tijd</b>         | <input type="checkbox"/> geen probleem<br><input type="checkbox"/> nu en dan, zelden probleem<br><input type="checkbox"/> bijna elke dag probleem<br><input type="checkbox"/> volledig gedesoriënteerd of onmogelijk te evalueren                                                                                                                                                                                                                        |
| <b>plaats</b>       | <input type="checkbox"/> geen probleem<br><input type="checkbox"/> nu en dan, zelden probleem<br><input type="checkbox"/> bijna elke dag probleem<br><input type="checkbox"/> volledig gedesoriënteerd of onmogelijk te evalueren                                                                                                                                                                                                                        |

### 12. Welke aandoeningen zijn van toepassing voor uw patiënt ?

| <u>Diverse:</u>                                            |                                              | <u>Infecties:</u>                         | <u>Kanker:</u>                          |
|------------------------------------------------------------|----------------------------------------------|-------------------------------------------|-----------------------------------------|
| <input type="checkbox"/> nierinsufficiëntie met predialyse | <input type="checkbox"/> CVA                 | <input type="checkbox"/> luchtweginfectie | <input type="checkbox"/> borstkanker    |
| <input type="checkbox"/> nierinsufficiëntie met dialyse    | <input type="checkbox"/> fracturen           | <input type="checkbox"/> urineweginfectie | <input type="checkbox"/> maagkanker     |
| <input type="checkbox"/> diabetes                          | <input type="checkbox"/> COPD                |                                           | <input type="checkbox"/> keelkanker     |
| <input type="checkbox"/> depressie                         | <input type="checkbox"/> pre-operatief       |                                           | <input type="checkbox"/> colonkanker    |
| <input type="checkbox"/> dementie                          | <input type="checkbox"/> post-operatief      |                                           | <input type="checkbox"/> longkanker     |
| <input type="checkbox"/> Parkinson                         | <input type="checkbox"/> reumatoïde artritis |                                           | <input type="checkbox"/> prostaatcancer |
|                                                            | <input type="checkbox"/> chronisch hartfalen |                                           | <input type="checkbox"/> andere         |

### 13. Welke bijkomende problemen vertoont uw patiënt?

- oedeem  
 slikproblemen  
 doorligwonden  
 kauwproblemen  
 ernstige stress door ziekte en/of psychologische problemen tijdens de laatste 3 maanden.

### 14. Is de patiënt minder gaan eten tijdens de laatste 3 maanden ?

- |                                                 |                                                                           |
|-------------------------------------------------|---------------------------------------------------------------------------|
| <input type="checkbox"/> niet minder gaan eten  | <input type="checkbox"/> veel minder gaan eten                            |
| <input type="checkbox"/> matig minder gaan eten | <input type="checkbox"/> geen voedselinname mogelijk de laatste > 5 dagen |

### 15. Hoeveel verschillende medicamenten neemt de patiënt gemiddeld per dag?

gemiddeld ..... verschillende medicamenten

- onbekend

### 16. Hoeveel maaltijden gebruikt de patiënt per dag? (met inbegrip van tussendoortjes)

gemiddeld ..... maaltijden

- onbekend

### 17. Gebruikt de patiënt medische bijvoedingen (rijk aan energie en/of eiwitten)?

- |                                         |                               |
|-----------------------------------------|-------------------------------|
| <input type="checkbox"/> ja             | <input type="checkbox"/> neen |
| Per sonde ? <input type="checkbox"/> ja | <input type="checkbox"/> neen |

### 18. Kan de patiënt een trap van 15 treden of meer op- en aflopen zonder te rusten?

- |                             |                               |
|-----------------------------|-------------------------------|
| <input type="checkbox"/> ja | <input type="checkbox"/> neen |
|-----------------------------|-------------------------------|

### 19. Kan de patiënt 5 minuten buiten wandelen zonder te rusten?

- |                             |                               |
|-----------------------------|-------------------------------|
| <input type="checkbox"/> ja | <input type="checkbox"/> neen |
|-----------------------------|-------------------------------|

### 20. Welke schaal wenst u te gebruiken voor de berekening?

- |                               |                                      |
|-------------------------------|--------------------------------------|
| <input type="checkbox"/> MUST | <input type="checkbox"/> MNA®- short |
|-------------------------------|--------------------------------------|

Bedankt voor het invullen van de vragenlijst.
